# Supplementary material for: Molecular and Clinical Prognostic Biomarkers of COVID-19 Severity and Persistence
Source: MDPI journal article supplement (doi:10.3390/pathogens11030311), 2022-03-02
Supplement: s1 [file s1]

## Supplementary Material

**Supplementary Table S1.** List of symbols, corresponding Entrez ID, names and aliases of genes differentially expressed in mild, moderate, severe and critical patients during the immune response genes in COVID-19.

| Gene Symbol | NCBI Entrez Gene | Gene Full Name                     | Aliases                                                                         | References |
|-------------|------------------|------------------------------------|---------------------------------------------------------------------------------|------------|
| ARG1        | 383              | arginase 1                         | -                                                                               | [39]       |
| CCL2        | 6347             | C-C motif chemokine ligand 2       | GDCF-2, HC11, HSMCR30, MCAF, MCP-1, MCP1, SCYA2, SMC-CF                         | [90]       |
| CCL3        | 6348             | C-C motif chemokine ligand 3       | G0S19-1, LD78ALPHA, MIP-1-alpha, MIP1A, SCYA3                                   | [68,85]    |
| CCL4        | 6351             | C-C motif chemokine ligand 4       | ACT2, AT744.1, G-26, HC21, LAG-1, LAG1, MIP-1-beta, MIP1B, MIP1B1, SCYA2, SCYA4 | [68,85]    |
| CCL5        | 6352             | C-C motif chemokine ligand 5       | D17S136E, RANTES, SCYA5, SIS-delta, SISd, TCP228, eoCP                          | [51]       |
| CCL8        | 6355             | C-C motif chemokine ligand 8       | HC14, MCP-2, MCP2, SCYA10, SCYA8                                                | [90]       |
| CCL22       | 6367             | C-C motif chemokine ligand 22      | A-152E5.1, ABCD-1, DC/B-CK, MDC, SCYA22, STCP-1                                 | [91]       |
| CD2         | 914              | CD2 molecule                       | LFA-2, SRBC, T11                                                                | [39]       |
| CD4         | 920              | CD4 molecule                       | CD4mut, IMD79, OKT4D                                                            | [39]       |
| CD38        | 952              | CD38 molecule                      | ADPRC 1, ADPRC1                                                                 | [62]       |
| CD44        | 960              | CD44 molecule (Indian blood group) | CDW44, CSPG8, ECMR-III, HCELL, HUTCH-I, IN, LHR, MC56, MDU2, MDU3, MIC4, Pgp1   | [68]       |
| CD74        | 972              | CD74 molecule                      | DHLA, HLADG, II, Ia-GAMMA, p33                                                  | [68]       |
| CD177       | 57126            | CD177 molecule                     | HNA-2a, HNA2A, NB1, NB1 GP, PRV-1, PRV1                                         | [39]       |
| CD244       | 51744            | CD244 molecule                     | 2B4, NAIL, NKR2B4, Nmrk, SLAMF4                                                 | [68]       |
| CD247       | 919              | CD247 molecule                     | CD3-ZETA, CD3H, CD3Q, CD3Z, IMD25, T3Z, TCRZ                                    | [39,51]    |
| CX3CR1      | 1524             | C-X3-C motif chemokine receptor 1  | CCRL1, CMKBRL1, CMKDR1, GPR13, GPRV28, V28                                      | [39]       |
| CXCL8       | 3576             | C-X-C motif chemokine ligand 8     | GCP-1, GCP1, IL8, LECT, LUCT, LYNAP, MDNCF, MONAP, NAF, NAP-1, NAP1, SCYB8      | [91]       |
| CXCL9       | 4283             | C-X-C motif chemokine ligand 9     | CMK, Humig, MIG, SCYB9, crg-10                                                  | [91]       |

|        |       |                                             |                                                                        |               |
|--------|-------|---------------------------------------------|------------------------------------------------------------------------|---------------|
| CXCL12 | 6387  | C-X-C motif chemokine ligand 12             | IRH, PBSF, SCYB12, SDF1, TLSF, TPAR1                                   | [91]          |
| ELANE  | 1991  | elastase, neutrophil expressed              | ELA2, GE, HLE, HNE, NE, PMN-E, SCN1                                    | [39]          |
| FUT4   | 2526  | fucosyltransferase 4                        | LeX, CD15, ELFT, FCT3A, FUTIV, SSEA-1, FUC-TIV                         | [39]          |
| GZMK   | 3003  | granzyme K                                  | TRYP2                                                                  | [51]          |
| H3F3B  | 3021  | H3 histone family member 3B                 | H3-3A, H3.3B, H3F3B                                                    | [88]          |
| HMGB2  | 3148  | high mobility group box 2                   | HMG2                                                                   | [51]          |
| IFI6   | 2537  | interferon alpha inducible protein 6        | 6-16, FAM14C, G1P3, IFI-6-16, IFI616                                   | [62]          |
| IFI27  | 3429  | interferon alpha inducible protein 27       | FAM14D, ISG12, ISG12A, P27                                             | [62]          |
| IFIH1  | 64135 | interferon induced with helicase C domain 1 | AGS7, Hlcd, IDDM19, MDA-5, MDA5, RLR-2, SGMRT1                         | [91]          |
| IFITM1 | 8519  | interferon induced transmembrane protein 1  | 9-27, CD225, DSPA2a, IFI17, LEU13                                      | [41,50,88,62] |
| IFITM2 | 10581 | interferon induced transmembrane protein 2  | 1-8D, DSPA2c                                                           | [50,88,62]    |
| IFITM3 | 10410 | interferon induced transmembrane protein 3  | 1-8U, DSPA2b, IP15                                                     | [62]          |
| IFNG   | 3458  | interferon gamma                            | IFG, IFI, IMD69                                                        | [88]          |
| IL-1B  | 3553  | interleukin 1 beta                          | IL-1, IL1F2, IL1-BETA, IL1beta                                         | [88]          |
| IL-7R  | 3575  | interleukin 7 receptor                      | CD127, CDW127, IL-7R-alpha, IL7RA, ILRA, CD127                         | [39]          |
| IL-10  | 3586  | Interleukin 10                              | CSIF, TGIF, GVHDS, CSIF IL10A                                          | [99,91]       |
| IRF-1  | 3659  | interferon regulatory factor 1              | MAR                                                                    | [96,96]       |
| IRF-4  | 3662  | interferon regulatory factor 4              | LSIRF, MUM1, NF-EM5, SHEP8                                             | [51]          |
| IRF-8  | 3394  | interferon regulatory factor 8              | H-ICSBP, ICSBP1, IMD32A, IMD32B, ICSBP                                 | [68]          |
| IRF-9  | 10379 | interferon regulatory factor 9              | ISGF3, ISGF3G, p48                                                     | [96]          |
| ISG20  | 3669  | interferon stimulated exonuclease gene 20   | CD25, HEM45                                                            | [50]          |
| ITGA2B | 3674  | integrin subunit alpha 2b                   | BDPLT16, BDPLT2, CD41, CD41B, GP2B, GPIIb, GT, GT1, GTA, HPA3, PPP1R93 | [62]          |
| KLF6   | 1316  | Kruppel like factor 6                       | BCD1, CBA1, COPEB, CPBP, GBF, PAC1, ST12, ZF9                          | [88]          |

|         |       |                                                       |                                                                             |         |
|---------|-------|-------------------------------------------------------|-----------------------------------------------------------------------------|---------|
| MKI67   | 4288  | marker of proliferation Ki-67                         | KIA, MIB-, MIB-1, PPP1R105                                                  | [51]    |
| MMP8    | 4317  | matrix metalloproteinase 8                            | CLG1, HNC, MMP-8, PMNL-CL                                                   | [39]    |
| MMP9    | 4318  | matrix metalloproteinase 9                            | CLG4B, GELB, MANDP2, MMP-9                                                  | [39,84] |
| MPO     | 4353  | myeloperoxidase                                       | -                                                                           | [39]    |
| MSR1    | 4481  | macrophage scavenger receptor 1                       | CD204, SCARA1, SR-A, SR-AI, SR-AII, SR-AIII, SRA, phSR1, phSR2              | [39]    |
| NLRC4   | 58484 | NLR family CARD domain containing 4                   | AIFEC, CARD12, CLAN, CLAN1, CLANA, CLANB, CLANC, CLAND, CLR2.1, FCAS4, IPAF | [39]    |
| ODC1    | 4953  | ornithine decarboxylase 1                             | BABS, NEDBA, NEDBIA, ODC                                                    | [62]    |
| OLFM4   | 10562 | olfactomedin 4                                        | GC1, GW112, OLM4, OlfD, UNQ362, bA209J19.1, hGC-1, hOlfD                    | [39]    |
| PADI4   | 23569 | peptidyl arginine deiminase 4                         | PAD, PAD4, PADI5, PDI4, PDI5                                                | [39]    |
| PAF1    | 54623 | PAF1 homolog Paf1/RNA polymerase II complex component | F23149_1, PD2                                                               | [88]    |
| PIM2    | 11040 | Pim-2 proto-oncogene, serine/threonine kinase         | -                                                                           | [62]    |
| PKM     | 5315  | pyruvate kinase, muscle                               | CTHBP, HEL-S-30, OIP3, PK3, PKM2, TCB, THBP1, p58                           | [62]    |
| POU2AF1 | 5450  | POU class 2 associating factor 1                      | BOB1, OBF-1, OBF1, OCAB                                                     | [51]    |
| PRDM1   | 639   | PR/SET domain 1                                       | BLIMP1, PRDI-BF1                                                            | [62]    |
| PRL     | 5617  | prolactin                                             | GHA1                                                                        | [88]    |
| RETN    | 56729 | resistin                                              | ADSF, FIZZ3, RETN1, RSTN, XCP1                                              | [39]    |
| S100A8  | 6279  | S100 calcium binding protein A8                       | 60B8AG, CAGA, CFAG, CGLA, CP-10, L1Ag, MA387, MIF, MRP8, NIF, P8            | [39,88] |
| S100A9  | 6280  | S100 calcium binding protein A9                       | 60B8AG, CAGB, CFAG, CGLB, L1AG, LIAG, MAC387, MIF, MRP14, NIF, P14          | [39]    |
| S100A12 | 6283  | S100 calcium binding protein A12                      | CAAF1, CAGC, CGRP, ENRAGE, MRP-6, MRP6, p6                                  | [39]    |

|        |       |                                                  |                                                                |      |
|--------|-------|--------------------------------------------------|----------------------------------------------------------------|------|
| SAT1   | 6303  | spermidine/spermine<br>N1-acetyltransferase<br>1 | DC21, KFSD, KFSDX, SAT,<br>SSAT, SSAT-1                        | [88] |
| SELL   | 6402  | selectin L                                       | CD62L, LAM1, LECAM1,<br>LEU8, LNHR, LSEL,<br>LYAM1, PLNHR, TQ1 | [51] |
| SLC1A4 | 6509  | solute carrier family<br>1 member 4              | ASCT1, SATT, SPATCCM                                           | [62] |
| SPP1   | 6696  | secreted<br>phosphoprotein 1                     | BNSP, BSPI, ETA-1, OPN                                         | [88] |
| STMN1  | 3925  | stathmin 1                                       | C1orf215, LAP18, Lag,<br>OP18, PP17, PP19, PR22,<br>SMN        | [51] |
| TBX21  | 30009 | T-box transcription<br>factor 21                 | TBET, T-PET, T-bet,<br>TBLYM                                   | [39] |
| TGFB1  | 7040  | transforming growth<br>factor beta 1             | CED, DPD1, IBDIMDE,<br>LAP, TGF-beta1, TGFB,<br>TGFBeta        | [62] |
| TGM2   | 7052  | transglutaminase 2                               | TGC, tTG, G(h), hTG2,<br>TG(C)                                 | [88] |
| TLR9   | 54106 | toll like receptor 9                             | CD289                                                          | [88] |
| TRAC   | 28755 | T-cell receptor alpha<br>constant                | IMD7, TCRA, TRA, TRCA                                          | [39] |
| TPRBC1 | 28639 | T cell receptor beta<br>constant 1               | BV05S1J2.2, TCRB,<br>TCRBC1                                    | [39] |
| XBP1   | 7494  | X-box binding<br>protein 1                       | TREB-5, TREB5, XBP-1,<br>XBP2                                  | [62] |
